# Supplementary material for: CRISPR-Cas9 multiplex genome editing of the hydroxyproline-O-galactosyltransferase gene family alters arabinogalactan-protein glycosylation and function in Arabidopsis
Source: PubMed Central journal article supplement (PMC7789275; doi:10.1186/s12870-020-02791-9), 2021-01-06
Supplement: 12870_2020_2791_MOESM1_ESM.pdf [file 12870_2020_2791_MOESM1_ESM.pdf]

126 **Supplemental Table 1.** List of guide RNA sequences and their target genes.

| <b>Target site (Target gene)</b> | <b>gRNA sequence</b>    |
|----------------------------------|-------------------------|
| 3-1 ( <i>GALT3</i> )             | GATTATCAGGAGAACTCGTCGG  |
| 3-2 ( <i>GALT3</i> )             | TTTCACTTCAGTCAGAATGAGGG |
| 3-3 ( <i>GALT3</i> )             | GTACTTCTTGAGCTTCCTTGTGG |
| 4-1 ( <i>GALT4</i> )             | GCGAGGCGACTGATAATGAGCGG |
| 4-2 ( <i>GALT4</i> )             | GAGAGCTTCTTCGACAATGGCGG |
| 4-3 ( <i>GALT4</i> )             | GTTCAACGAGACTAGACCAGTGG |
| 6-1 ( <i>GALT6</i> )             | TATCACAAACCACTTCGCCAGGG |
| 6-2 ( <i>GALT6</i> )             | CCCGTACTCGCAAATTGCAACGG |
| 6-3 ( <i>GALT6</i> )             | GGCTTAGTCGATTAATAGGTCGG |

127

128
