# Supplementary material for: CRISPR-Cas9 multiplex genome editing of the hydroxyproline-O-galactosyltransferase gene family alters arabinogalactan-protein glycosylation and function in Arabidopsis
Source: PubMed Central journal article supplement (PMC7789275; doi:10.1186/s12870-020-02791-9), 2021-01-06
Supplement: 12870_2020_2791_MOESM2_ESM.pdf [file 12870_2020_2791_MOESM2_ESM.pdf]

129 **Supplemental Table 2.** Names of the primer pairs for amplifying each polycistronic tRNA-  
130 guide RNA (PTG) unit.

| <b>Forward Primer</b> | <b>Reverse Primer</b> | <b>PTG units</b> |
|-----------------------|-----------------------|------------------|
| pHEE_L5AD5-F          | GALT3-2_gR1_R         | PTG 1            |
| GALT3-2_gR1_F         | GALT3-1_gR2_R         | PTG 1-2          |
| GALT3-1_gR2_F         | GALT4-1_gR3_R         | PTG 2-3          |
| GALT4-1_gR3_F         | GALT6-2_gR4_R         | PTG 3-4          |
| GALT6-2_gR4_F         | GALT6-1_gR5_R         | PTG 4-5          |
| GALT6-1_gR5_F         | L5AD5-R               | PTG 5            |

131

132
