# Supplementary material for: CRISPR-Cas9 multiplex genome editing of the hydroxyproline-O-galactosyltransferase gene family alters arabinogalactan-protein glycosylation and function in Arabidopsis
Source: PubMed Central journal article supplement (PMC7789275; doi:10.1186/s12870-020-02791-9), 2021-01-06
Supplement: 12870_2020_2791_MOESM3_ESM.pdf [file 12870_2020_2791_MOESM3_ESM.pdf]

133 **Supplemental Table 3.** List of primer sequences for PTG cloning.

| Primer Name   | Sequence                                                 |
|---------------|----------------------------------------------------------|
| pHEE_L5AD5-F  | CGGGTCTCGATTGGGATGGGCAGTCTGATTGACAAAGCACCAGTGG           |
| GALT3-2_gR1_R | ATGGTCTCAACTGAAGTGAAATGCACCAGCCGGGAA                     |
| GALT3-2_gR1_F | TAGGTCTCCCAGTCAGAATGAGTTTTAGAGCTAGAA                     |
| GALT3-1_gR2_R | ATGGTCTCACTCCTGATAATCTGCACCAGCCGGGAA                     |
| GALT3-1_gR2_F | TAGGTCTCCGGAGAACTCGTGTTTTAGAGCTAGAA                      |
| GALT4-1_gR3_R | ATGGTCTCACAGTCGCCTCGCTGCACCAGCCGGGAA                     |
| GALT4-1_gR3_F | TAGGTCTCCACTGATAATGAGGTTTTAGAGCTAGAA                     |
| GALT6-2_gR4_R | ATGGTCTCATGCGAGTACGGGTGCACCAGCCGGGAA                     |
| GALT6-2_gR4_F | TAGGTCTCCCGCAAATTGCAAGTTTTAGAGCTAGAA                     |
| GALT6-1_gR5_R | ATGGTCTCATGGTTTGTGATATGCACCAGCCGGGAA                     |
| GALT6-1_gR5_F | TAGGTCTCCACCACTTCGCCAGTTTTAGAGCTAGAA                     |
| pHEE_L5AD5-R  | TAGGTCTCCAAACGGATGAGCGACAGCAAACAAAAAAAAAAGCACC<br>GACTCG |
| pHEE_S5AD5-F  | CGGGTCTCAATTGGGATGGGCAGTCTGATTG                          |
| pHEE_S5AD5-R  | TAGGTCTCCAAACGGATGAGCGACAGCAAAC                          |

134

135
