# Supplementary material for: CRISPR-Cas9 multiplex genome editing of the hydroxyproline-O-galactosyltransferase gene family alters arabinogalactan-protein glycosylation and function in Arabidopsis
Source: PubMed Central journal article supplement (PMC7789275; doi:10.1186/s12870-020-02791-9), 2021-01-06
Supplement: 12870_2020_2791_MOESM4_ESM.pdf [file 12870_2020_2791_MOESM4_ESM.pdf]

136 **Supplemental Table 4.** List of primer sequences used to clone the second CRISPR multiplexing  
137 construct.

| Primer Name  | Sequence                                          |
|--------------|---------------------------------------------------|
| DT1-BsF_3-3  | ATATATGGTCTCGATTGTA CTTCTTGAGCTTCCTTGGTT          |
| DT1-F0_3-3   | TGTA CTTCTTGAGCTTCCTTGGTTTTAGAGCTAGAAATAGC        |
| DT0-BsR2     | ATATTATTGGTCTCAATCTCTTAGTCGACTCTACCAAT            |
| DT2-BsF2_4-2 | ATATTATTGGTCTCAAGATTGAGAGCTTCTTCGACAATGGGTT       |
| DT2-F0_4-2   | TGAGAGCTTCTTCGACAATGGGTTTTAGAGCTAGAAATAGC         |
| DT0-BsR3     | ATATTATTGGTCTCATCACTACTTCGTCTCTAACCAT             |
| DT3-BsF3_4-3 | ATATTATTGGTCTCAGTGATTGTTCAACGAGACTAGACCAGGTT      |
| DT3-F0_4-3   | TGTTCAACGAGACTAGACCAGGTTTTAGAGCTAGAAATAGC         |
| DT4-R0_6-3   | AACACCTATTAATCGACTAAGCCAATCACTACTTCGACTCTAGCTGTAT |
| DT4-BsR_6-3  | ATTATTGGTCTCTAAACACCTATTAATCGACTAAGC              |

138

139
