# Supplementary material for: CRISPR-Cas9 multiplex genome editing of the hydroxyproline-O-galactosyltransferase gene family alters arabinogalactan-protein glycosylation and function in Arabidopsis
Source: PubMed Central journal article supplement (PMC7789275; doi:10.1186/s12870-020-02791-9), 2021-01-06
Supplement: 12870_2020_2791_MOESM5_ESM.pdf [file 12870_2020_2791_MOESM5_ESM.pdf]

140 **Supplemental Table 5.** Quantitative data of phenotypes of WT, 25, 346, and 23456 mutants

| <b>Phenotype</b>             | <b>WT</b>    | <b>25<br/>double mutant</b> | <b>346<br/>triple mutant</b> | <b>23456 quintuple<br/>mutant</b> |
|------------------------------|--------------|-----------------------------|------------------------------|-----------------------------------|
| <b>Plant Height (cm)</b>     | 38.3 ± 2.0   | 38.0 ± 2.1                  | 34.4 ± 1.9 <sub>a</sub>      | 32.3 ± 3.7 <sub>c</sub>           |
| <b>Rosette Number</b>        | 26.2 ± 3.5   | 23.8 ± 3.6                  | 25.8 ± 3.1                   | 19.7 ± 4.3 <sub>c</sub>           |
| <b>Flowering Time (days)</b> | 25.6 ± 0.9   | 26.1 ± 0.8                  | 25.8 ± 0.9                   | 27.6 ± 1.4 <sub>c</sub>           |
| <b>Siliques per plant</b>    | 278.1 ± 50.4 | 206.5 ± 43.6 <sub>b</sub>   | 184.4 ± 31.6 <sub>c</sub>    | 97.0 ± 58.7 <sub>c</sub>          |
| <b>Silique Length (mm)</b>   | 20.3 ± 3.5   | 19.7 ± 0.5                  | 22.2 ± 2.7 <sub>c</sub>      | 16.4 ± 3.8 <sub>c</sub>           |
| <b>Seeds per silique</b>     | 40.0 ± 7.6   | 41.8 ± 9.8                  | 45.1 ± 6.6 <sub>c</sub>      | 26.8 ± 9.8 <sub>c</sub>           |

141 \* Five-week-old plants were used for plant height and rosette number measurements, silique data  
 142 were taken from six-week-old plants, and approximately 15-20 plants were used for each  
 143 genotype (a, P<0.05; b, P<0.01; c, P<0.001).  
 144
