# Supplementary material for: CRISPR-Cas9 multiplex genome editing of the hydroxyproline-O-galactosyltransferase gene family alters arabinogalactan-protein glycosylation and function in Arabidopsis
Source: PubMed Central journal article supplement (PMC7789275; doi:10.1186/s12870-020-02791-9), 2021-01-06
Supplement: 12870_2020_2791_MOESM6_ESM.pdf [file 12870_2020_2791_MOESM6_ESM.pdf]

145 **Supplemental Table 6.** List of primers for sequencing off-targets of the *GALT* genes

| <b>Primer Name</b> | <b>Sequence</b>       |
|--------------------|-----------------------|
| 3-1_At2g34660_F    | GTTTTGGTGGGGAGGATTTT  |
| 3-1_At2g34660_R    | GTTTCCGAATCTGCCAAGAA  |
| 3-2_At1g70100_F    | CAGAACCGGGAAAGAACAGA  |
| 3-2_At1g70100_R    | TTACCGGTTTCTTCGTCACC  |
| 3-3_At2g13520_F    | CCAAATTGGCCTAGAATTGC  |
| 3-3_At2g13520_R    | CCTTTGCTTGAAAACCATTCA |
| 4-1_At2g19130_F    | GCTTGCCAAGGAGATTGTTC  |
| 4-1_At2g19130_R    | TCAAGCCTCTTCACCGCTAT  |
| 6-1_At4g15545_F    | CTAAGCCGACACCAAACGAT  |
| 6-1_At4g15545_R    | TGTGGGCGTTAAGATCCTTC  |

146
