# Supplementary material for: CRISPR-Cas9 multiplex genome editing of the hydroxyproline-O-galactosyltransferase gene family alters arabinogalactan-protein glycosylation and function in Arabidopsis
Source: PubMed Central journal article supplement (PMC7789275; doi:10.1186/s12870-020-02791-9), 2021-01-06

Supplemental Figure 1-A

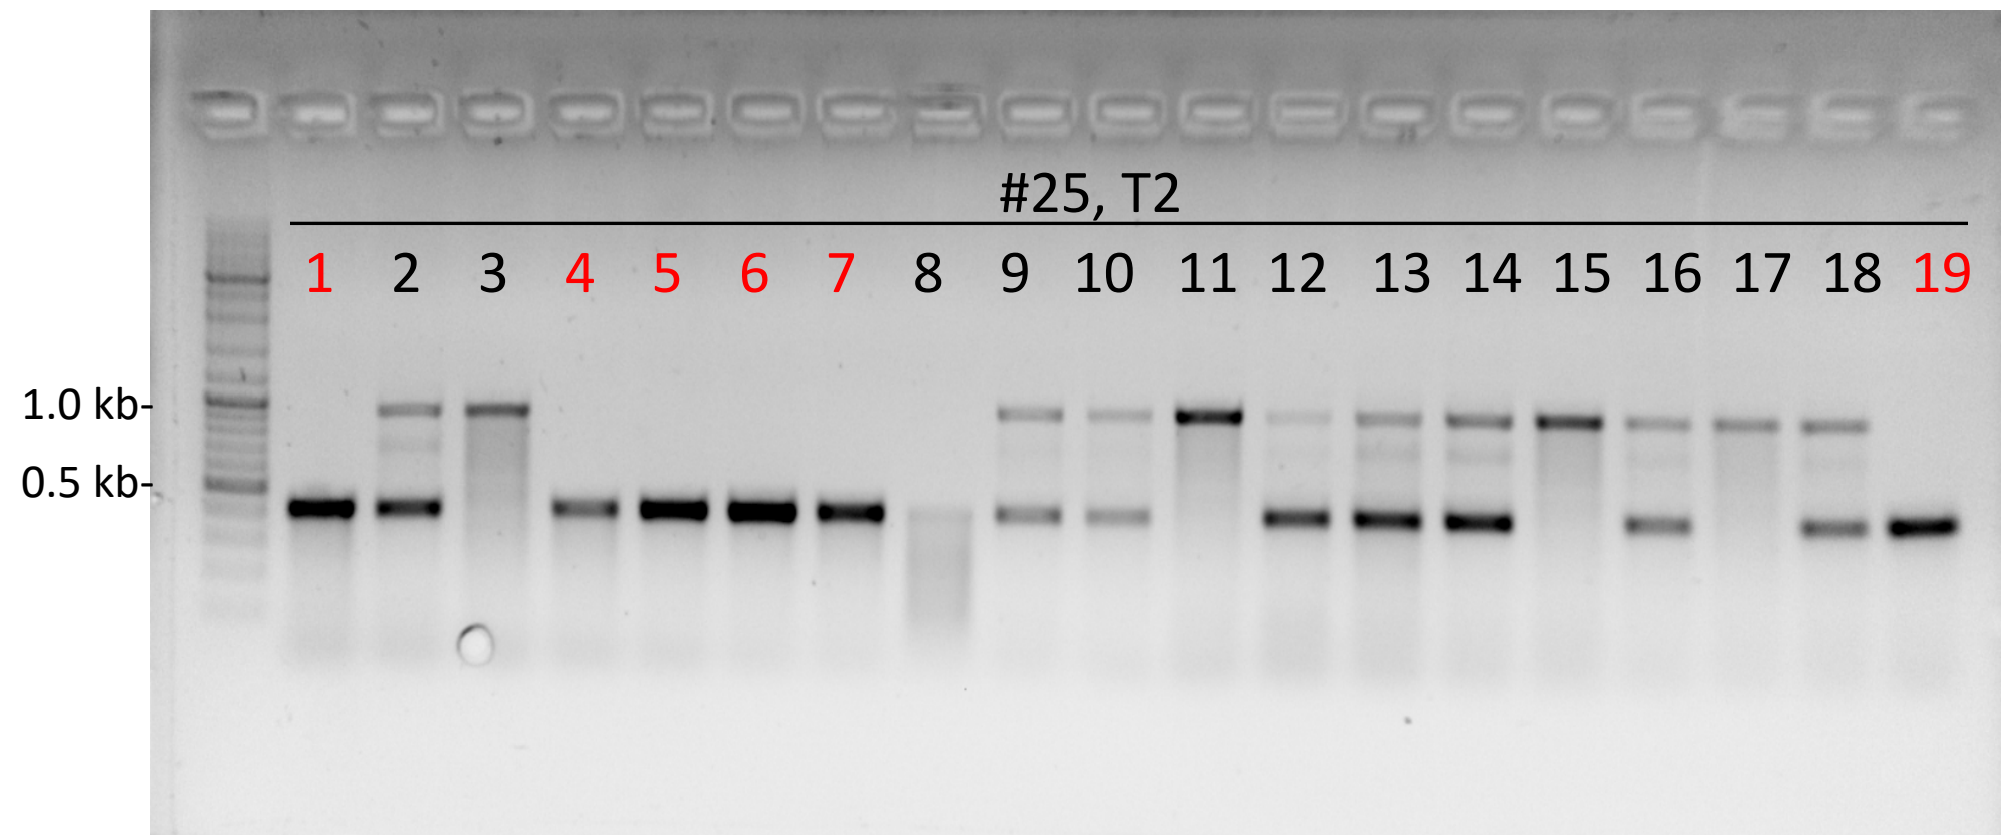

Supplemental Figure 1-B

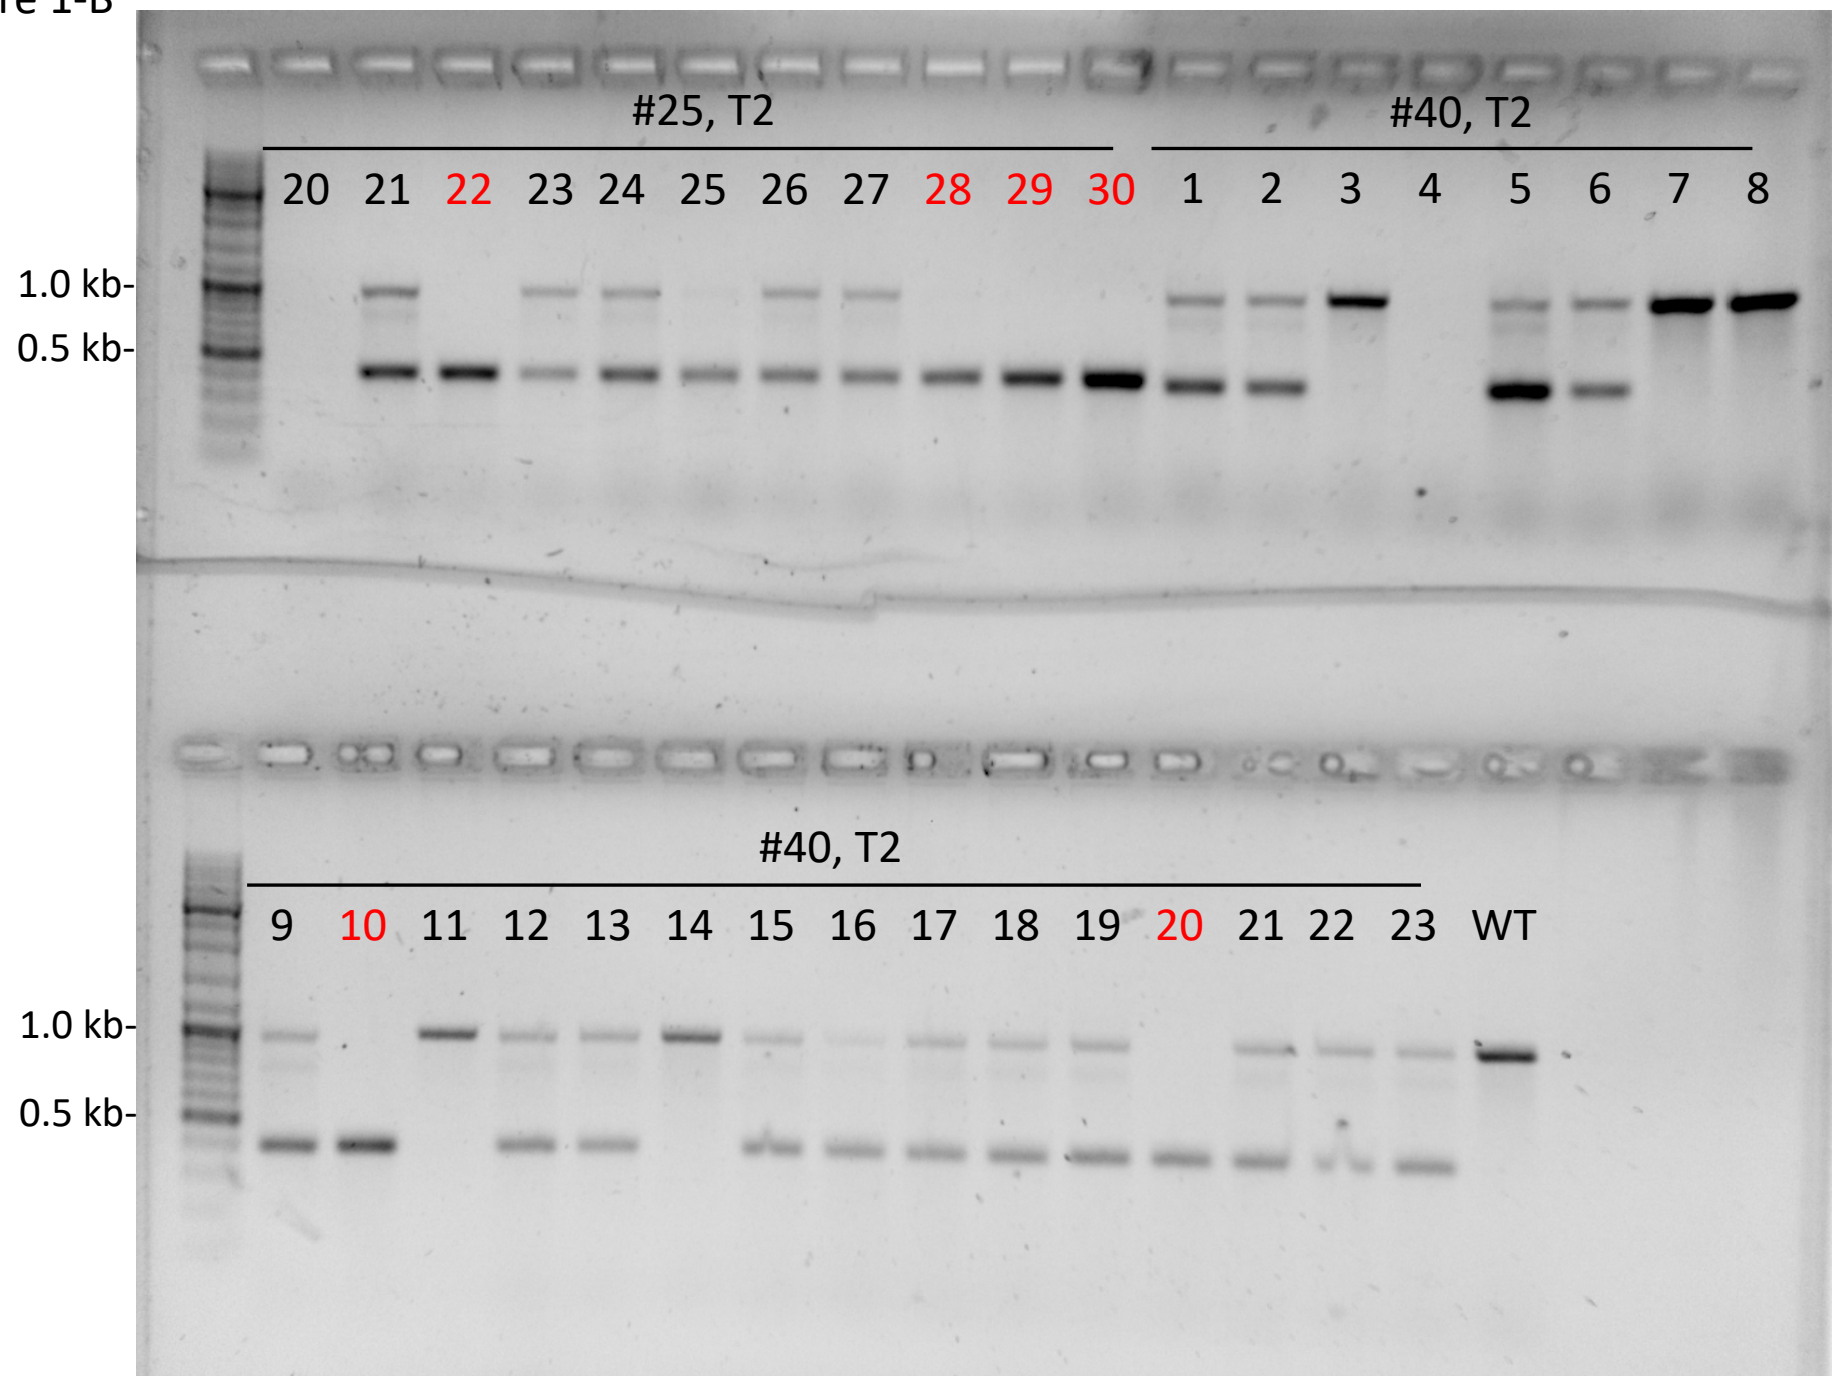

Supplemental Figure 1-C

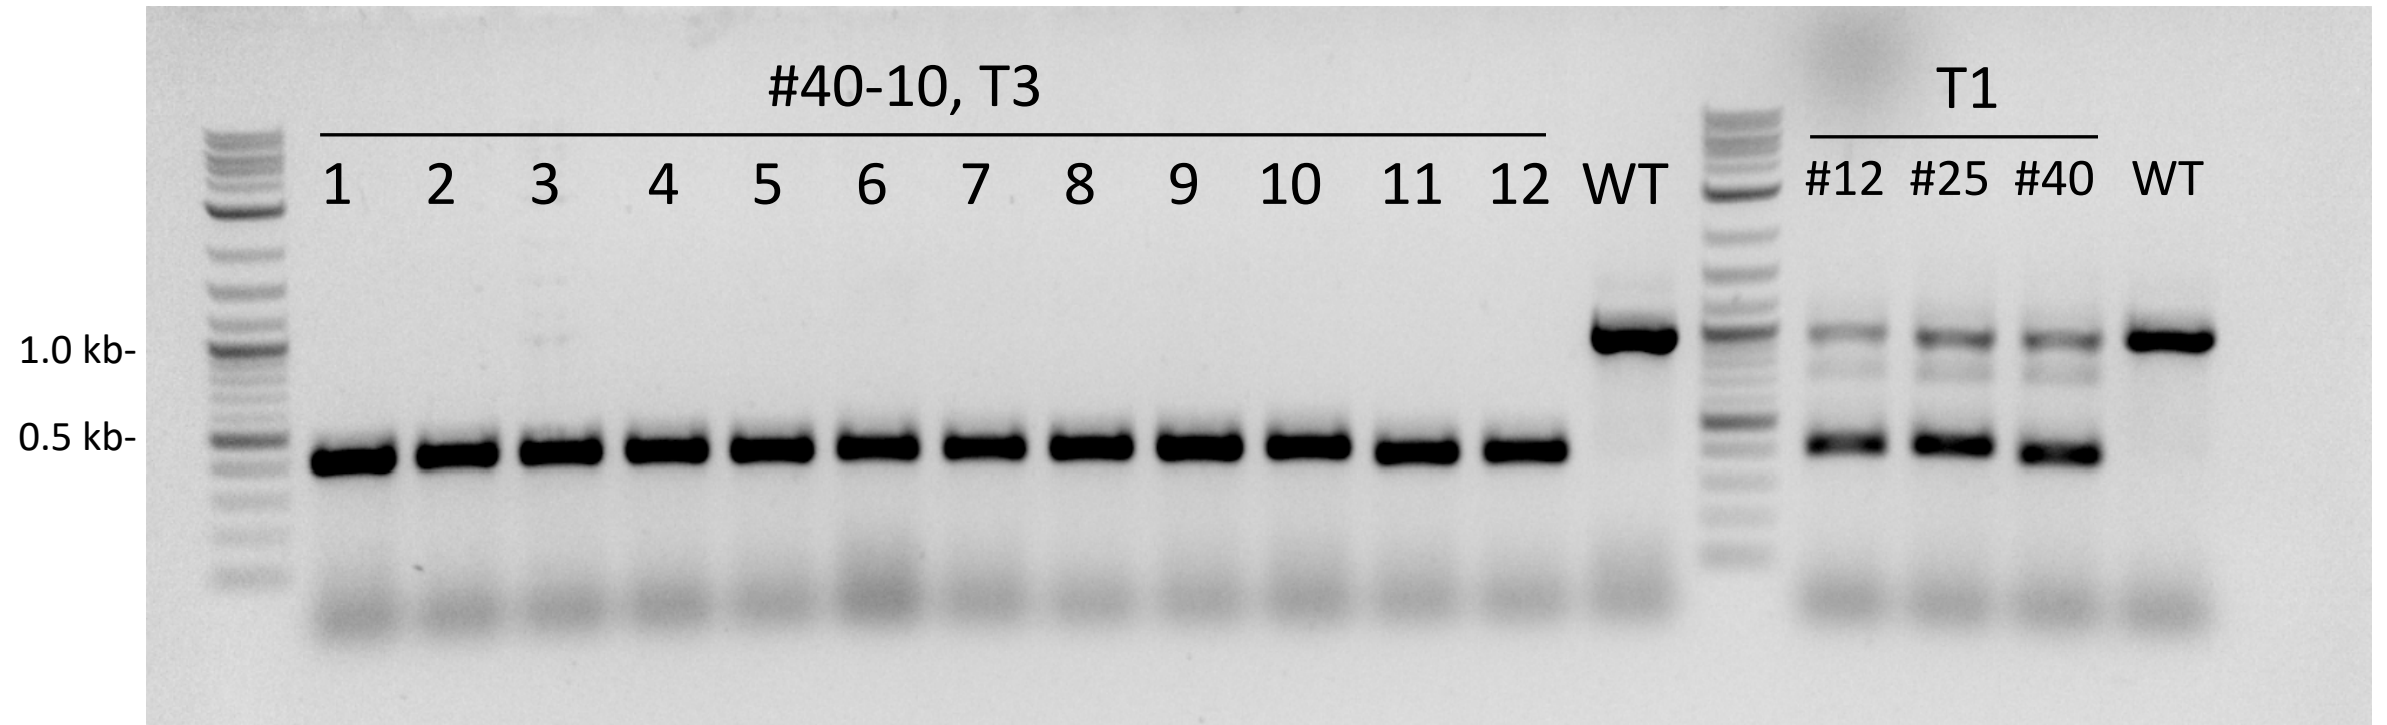



Supplemental Figure 2

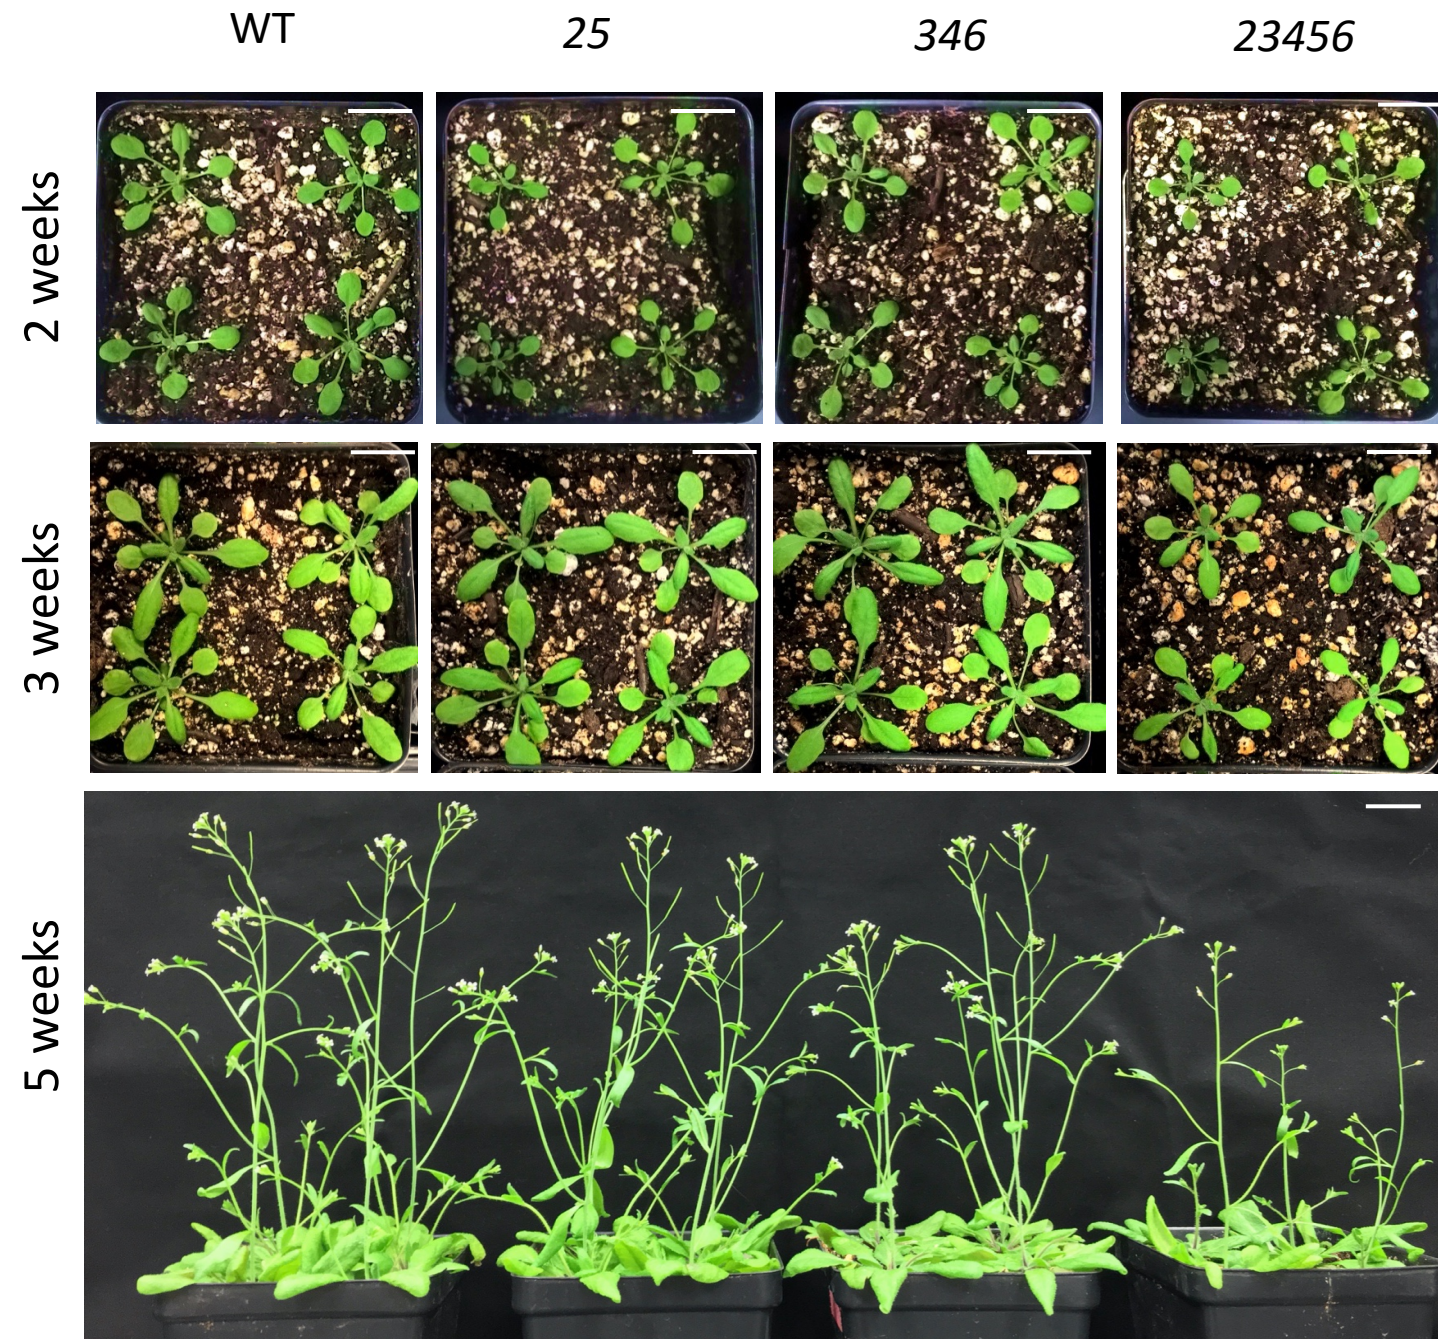

Supplement: 12870_2020_2791_MOESM7_ESM.pdf [file 12870_2020_2791_MOESM7_ESM.pdf]
